# Supplementary material
Source: Springer Nature journal article supplement (https://www.springermedizin.de/resource/supplementary/13058_2012_3049_MOESM3_ESM.pdf/9703152)

**A****BM1**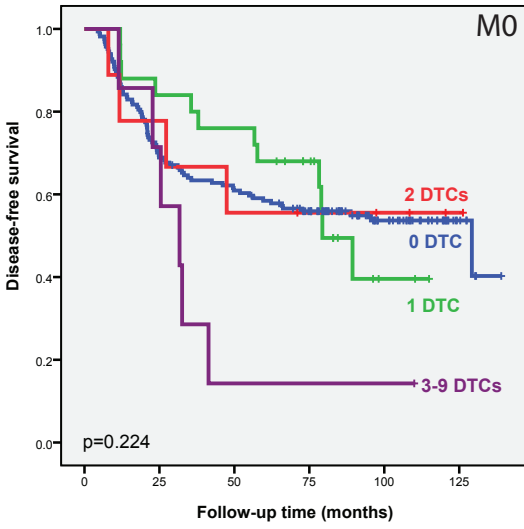**B****BM3**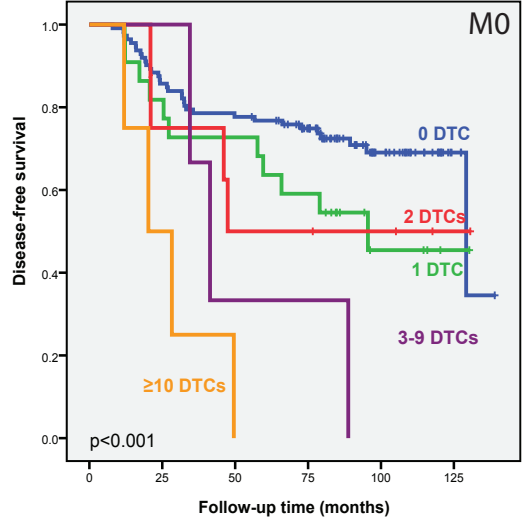**C****BM1**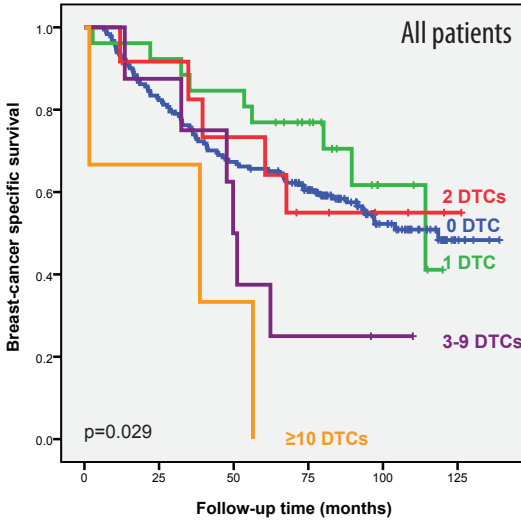**D****BM3**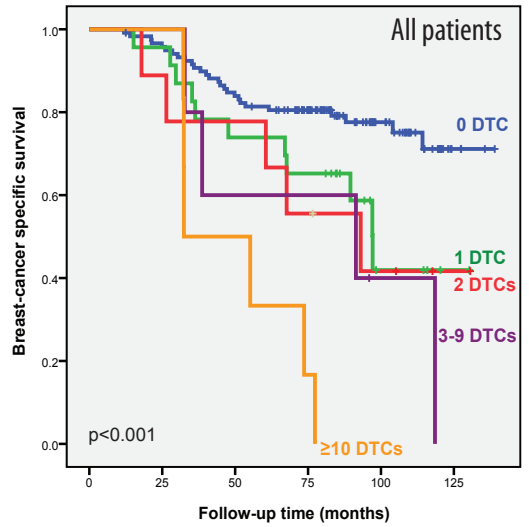**E****BM1**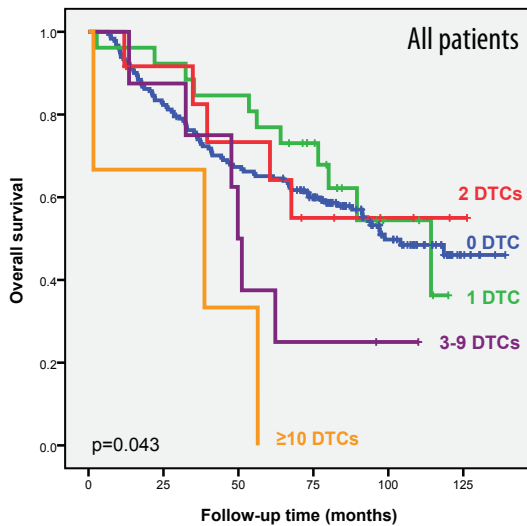**F****BM3**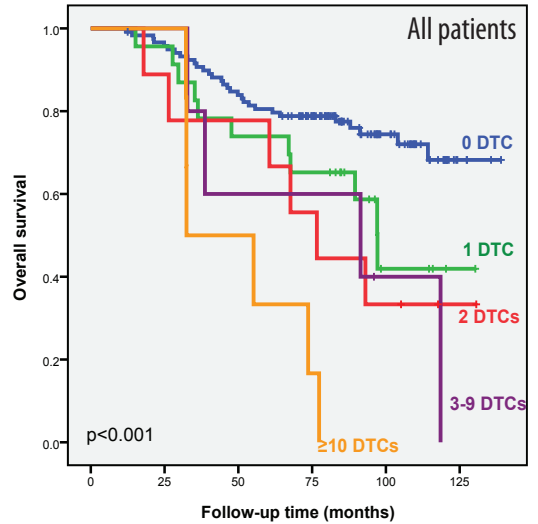

Supplement: MOESM3 [file 9703152]
